# Supplementary material
Source: PubMed Central journal article supplement (PMC7461691)
Supplement: ASN.2020040426SupplementaryData.pdf [file ASN.2020040426SupplementaryData.pdf]

## Supplemental material Contents

|           |                                                                                                     |
|-----------|-----------------------------------------------------------------------------------------------------|
| Table S1  | Risk Factors for AKI Tested by Univariate Cox Proportional Hazards Models                           |
| Table S2  | Risk Factors Predicting Death Tested by Univariate Cox Proportional Hazards Model                   |
| Table S3  | The Autopsied AKI Patients Had Comparable Demographic and Clinical Features with Other AKI Patients |
| Figure S1 | Compositions of Secondary Infections                                                                |

**Table S1 Risk Factors for AKI Tested by Univariate Cox Proportional Hazards Models**

|                                 | Univariate Cox proportional hazards model |                      |       |
|---------------------------------|-------------------------------------------|----------------------|-------|
|                                 | $\beta$                                   | RR (95% CI)          | P     |
| Demographics                    |                                           |                      |       |
| Age (per 10 years)              | 0.529                                     | 1.697 (1.238, 2.327) | 0.001 |
| Male                            | 0.681                                     | 1.977 (0.983, 3.974) | 0.056 |
| Past Medical History            |                                           |                      |       |
| Pre-existing Hypertension       | 0.273                                     | 1.314 (0.708, 2.438) | 0.387 |
| Diabetes                        | 0.234                                     | 1.263 (0.627, 2.545) | 0.513 |
| Coronary Heart Disease          | -0.304                                    | 0.738 (0.340, 1.601) | 0.442 |
| Symptoms                        |                                           |                      |       |
| Fever                           | -0.688                                    | 0.502 (0.219, 1.155) | 0.105 |
| Anorexia                        | -0.402                                    | 0.669 (0.334, 1.338) | 0.256 |
| Vomit                           | -0.585                                    | 0.557 (0.197, 1.574) | 0.269 |
| Diarrhea                        | -0.390                                    | 0.677 (0.323, 1.422) | 0.303 |
| Lab Tests Findings              |                                           |                      |       |
| Anemia                          | -0.268                                    | 0.765 (0.399, 1.464) | 0.418 |
| Thrombocytopenia                | 0.465                                     | 1.593 (0.809, 3.134) | 0.178 |
| Serum IL-6 (ng/ml) <sup>1</sup> | 0.587                                     | 1.798 (1.216, 2.661) | 0.003 |
| D-dimer Categories <sup>2</sup> | 0.273                                     | 1.314 (0.905, 1.909) | 0.151 |
| hsCRP (mg/L) <sup>3</sup>       | 0.003                                     | 1.003 (0.998, 1.007) | 0.252 |
| Complications                   |                                           |                      |       |
| Shock                           | 0.455                                     | 1.561 (0.801, 3.042) | 0.191 |
| Cardiac Injuries                | 0.090                                     | 1.094 (0.504, 2.373) | 0.820 |
| Coagulopathy                    | 0.550                                     | 1.733 (0.867, 3.466) | 0.120 |
| Secondary Infections            | -0.218                                    | 0.804 (0.423, 1.531) | 0.507 |
| Glucocorticoid                  | -0.483                                    | 0.617 (0.273, 1.396) | 0.246 |
| Treatment                       |                                           |                      |       |
| Anti-viral medications          | -0.089                                    | 0.915 (0.422, 1.983) | 0.822 |
| Antibiotics                     | -0.044                                    | 0.957 (0.295, 3.109) | 0.942 |
| IVIg                            | -0.542                                    | 0.581 (0.267, 1.268) | 0.173 |
| Vasopressors                    | 0.480                                     | 3.129 (1.220, 8.024) | 0.018 |

IVIg: Intravenous Immunoglobulin; hsCRP: high-sensitive C reactive protein; IL-6: interleukin 6

<sup>1</sup>64 patients (32 AKIs) were included in the analysis.

<sup>2</sup>D-dimer levels were classified into 4 categories: <0.5 as category 1, 0.5-5.0 as category 2, 5.0-21.0 as category 3 and >21.0 as category 4

<sup>3</sup>77 patients (39 AKIs) were included in the analysis.

Shock was defined hypotension requiring vasopressor therapy to maintain mean BP 65 mm Hg or greater and having a serum lactate level greater than 2 mmol/L after adequate fluid resuscitation.

**Table S2 Risk Factors Predicting Death Tested by Univariate Cox Proportional Hazards Models**

|                                   | Univariate Cox proportional hazards model |                      |        |
|-----------------------------------|-------------------------------------------|----------------------|--------|
|                                   | $\beta$                                   | RR (95% CI)          | P      |
| Demographics                      |                                           |                      |        |
| Age (per 10 years)                | 0.265                                     | 1.303 (1.009, 1.683) | 0.042  |
| Male                              | 0.913                                     | 2.492 (1.377, 4.507) | 0.003  |
| Past Medical History              |                                           |                      |        |
| Pre-existing Hypertension         | 0.069                                     | 1.072 (0.645, 1.780) | 0.789  |
| Diabetes                          | -0.146                                    | 0.864 (0.456, 1.635) | 0.653  |
| Coronary Heart Disease            | -0.244                                    | 0.783 (0.416, 1.476) | 0.450  |
| Lab Tests Findings                |                                           |                      |        |
| Leukocytosis                      | 0.618                                     | 1.855 (1.019, 3.377) | 0.043  |
| Anemia                            | -0.370                                    | 0.691 (0.401, 1.191) | 0.183  |
| Thrombocytopenia                  | 0.497                                     | 1.644 (0.935, 2.889) | 0.084  |
| Hypernatremia                     | 0.744                                     | 2.103 (1.252, 3.535) | 0.005  |
| Serum IL-6 (ng/ml) <sup>1</sup>   | 0.543                                     | 1.720 (1.238, 2.391) | 0.001  |
| D-dimer Categories <sup>2</sup>   | 0.791                                     | 2.205 (1.357, 3.585) | 0.001  |
| hsCRP (mg/L) <sup>3</sup>         | 0.001                                     | 1.001 (0.998, 1.005) | 0.459  |
| Elevated sCr                      | 0.593                                     | 1.810 (1.048, 3.125) | 0.033  |
| eGFR (ml/min/1.73m <sup>2</sup> ) | -0.008                                    | 0.992 (0.985, 0.999) | 0.034  |
| Complications                     |                                           |                      |        |
| ARDS                              | -0.574                                    | 0.563 (0.173, 1.835) | 0.341  |
| Shock                             | 0.540                                     | 1.717 (0.966, 3.050) | 0.065  |
| Cardiac Injury                    | 0.494                                     | 1.638 (0.806, 3.330) | 0.172  |
| Coagulopathy                      | 0.461                                     | 1.586 (0.903, 2.785) | 0.108  |
| Hypercapnia                       | 0.015                                     | 1.015 (0.603, 1.709) | 0.956  |
| All AKI                           | 0.365                                     | 1.441 (0.864, 2.402) | 0.162  |
| KDIGO Stage 3 AKI                 | 0.745                                     | 2.107 (1.181, 3.760) | 0.012  |
| Clinical Evaluations              |                                           |                      |        |
| APACHE II score                   | 0.037                                     | 1.038 (1.006, 1.072) | 0.021  |
| SOFA score                        | 0.111                                     | 1.118 (1.053, 1.187) | <0.001 |
| Treatment                         |                                           |                      |        |

---

|                        |        |                      |       |
|------------------------|--------|----------------------|-------|
| Corticosteroids        | 0.275  | 1.316 (0.566, 3.061) | 0.524 |
| Anti-viral medications | -0.015 | 0.985 (0.511, 1.898) | 0.964 |
| Antibiotics            | 0.304  | 1.361 (0.425, 4.360) | 0.604 |
| IVIG                   | -0.731 | 0.481 (0.253, 0.917) | 0.026 |

---

<sup>1</sup>64 patients (56 deaths) were included in the analysis, IL-6 was calculated in ng/ml.

<sup>2</sup>D-dimer levels were classified into 4 categories: <0.5 as category 1, 0.5-5.0 as category 2, 5.0-21.0 as category 3 and >21.0 as category 4

<sup>3</sup>77 patients (45 deaths) were included in the analysis.

**Table S3 The Autopsied AKI Patients Had Comparable Demographic and Clinical Features with Other AKI Patients**

|                                   | Autopsied Patients<br>(n=10) | Other AKI Patients<br>(n=31) | P Value |
|-----------------------------------|------------------------------|------------------------------|---------|
| Age (years)                       | 68.8±10.2                    | 69.9±9.1                     | 0.765   |
| Male : Female                     | 8:2                          | 22:9                         | 0.700   |
| Hypertension                      | 5 (50.0%)                    | 17 (54.8%)                   | 0.655   |
| Diabetes                          | 2 (20.0%)                    | 9 (29.0%)                    | 0.700   |
| Serum Creatinine (µmol/L)         | 107.0 (56.2-202.8)           | 104.0 (82.0-171.0)           | 0.867   |
| eGFR (ml/min/1.73m <sup>2</sup> ) | 59.4 (26.6-97.1)             | 53.0 (32.8-82.5)             | 0.638   |
| IL-6 (pg/ml)                      | 150.5 (57.7-385.0)           | 78.8 (32.6-215.4)            | 0.290   |
| Shock                             | 6 (60.0%)                    | 22 (71.0%)                   | 0.698   |
| Vasopressors                      | 8 (80.0%)                    | 28 (90.3%)                   | 0.580   |
| Corticosteroids                   | 8 (80.0%)                    | 26 (83.9%)                   | 1.000   |
| Anti-viral Medications            | 8 (80.0%)                    | 25 (80.6%)                   | 1.000   |
| Antibiotics                       | 10 (100.0%)                  | 28 (90.3%)                   | --      |
| IVIG                              | 9 (90.0%)                    | 24 (77.4%)                   | 0.653   |

IVIG: Intravenous Immunoglobulin; IL-6: interleukin 6.

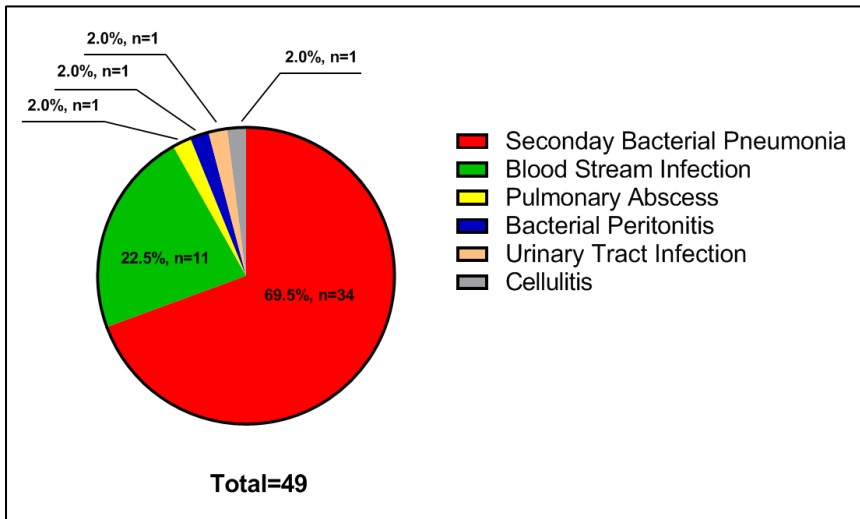

**Figure S1 Compositions of Secondary Infections**

47 patients experienced 49 episodes of secondary infections. Secondary bacterial pneumonia and blood stream infections were the most common. Bacterial pneumonia was diagnosed based on the symptom of newly onset fever, yellow sputum and image changes (Chest X-ray or CT scan). Blood stream infections was diagnosed based on the newly onset fever and positive blood culture. One patient's chest CT scan showed pulmonary abscess with cavities and gas-fluids levels inside. One patient who had fever, signs of peritoneal irritations after several days of diffuse bowel obstruction was diagnosed bacterial peritonitis. One patient who had newly onset of fever accompanied with cloudy urine and positive urine culture afterward was diagnosed of urinary tract infection. One patient had fever and signs of cellulitis on her left foot. All these infections happened after the hospital presentation.
